# Supplementary material for: Xanthogranulomatous Orchitis Combined with Contralateral Acute Pyogenic Orchitis: A Rare Case Report
Source: Preprints.org preprint supplement (doi:10.20944/preprints202401.1729.v1), 2024-01-24
Supplement: Supplementary file 1 [file supplementary]

**Title page**

**Xanthogranulomatous orchitis combined with contralateral acute pyogenic orchitis: a rare case reporte**

**Authors:** Yu Daia, Yan-hu Menga,,Ying-yi Lia，Shuagnning Liu

Yu Dai： aBaoji People's Hospital, Department of Urology, Baoji, Shaanxi,China

Yan-hu Meng：Baoji People's Hospital, Department of Urology, Baoji, Shaanxi,China

Ying-yi Li：Baoji People's Hospital, Department of Urology, Baoji, Shaanxi,China

Shuagnning Liu ：Baoji People's Hospital, Department of Urology, Baoji, Shaanxi,China

Corresponding Author:Yan-hu Meng, Department of Urology, Baoji People’s Hospital, 24 Xinhua Lane, Jinger Road, Weibin District, Baoji, Shaanxi 721000, China

TEL:86-18392786477 Email: [769794283@qq.com](mailto:3036565766@qq.com)

Short Title: Xanthogranulomatous orchitis with acute pyogenic orchitis

Number of Tables: Four

Number of Figures: 85

Word count: 1580

Keywords: Xanthogranulomatous orchitis; suppurative orchitis; case report
